# Supplementary material
Source: publisher site journal article supplement (https://www.dovepress.com/article/528752)
Supplement: Supplementary file 1 [file 528752-supporting-information_1.docx]

Supporting Information

**Iron-Oxide Labeled Stem Cells With Specific Magnetic Occurrence For Effective In Mouse Model Of Cisplatin-induced Acute Kidney Injury**

**Ke Wang1,2#, Ye Zhao3#, Huiying Lv1, Xiuying Li1***

**
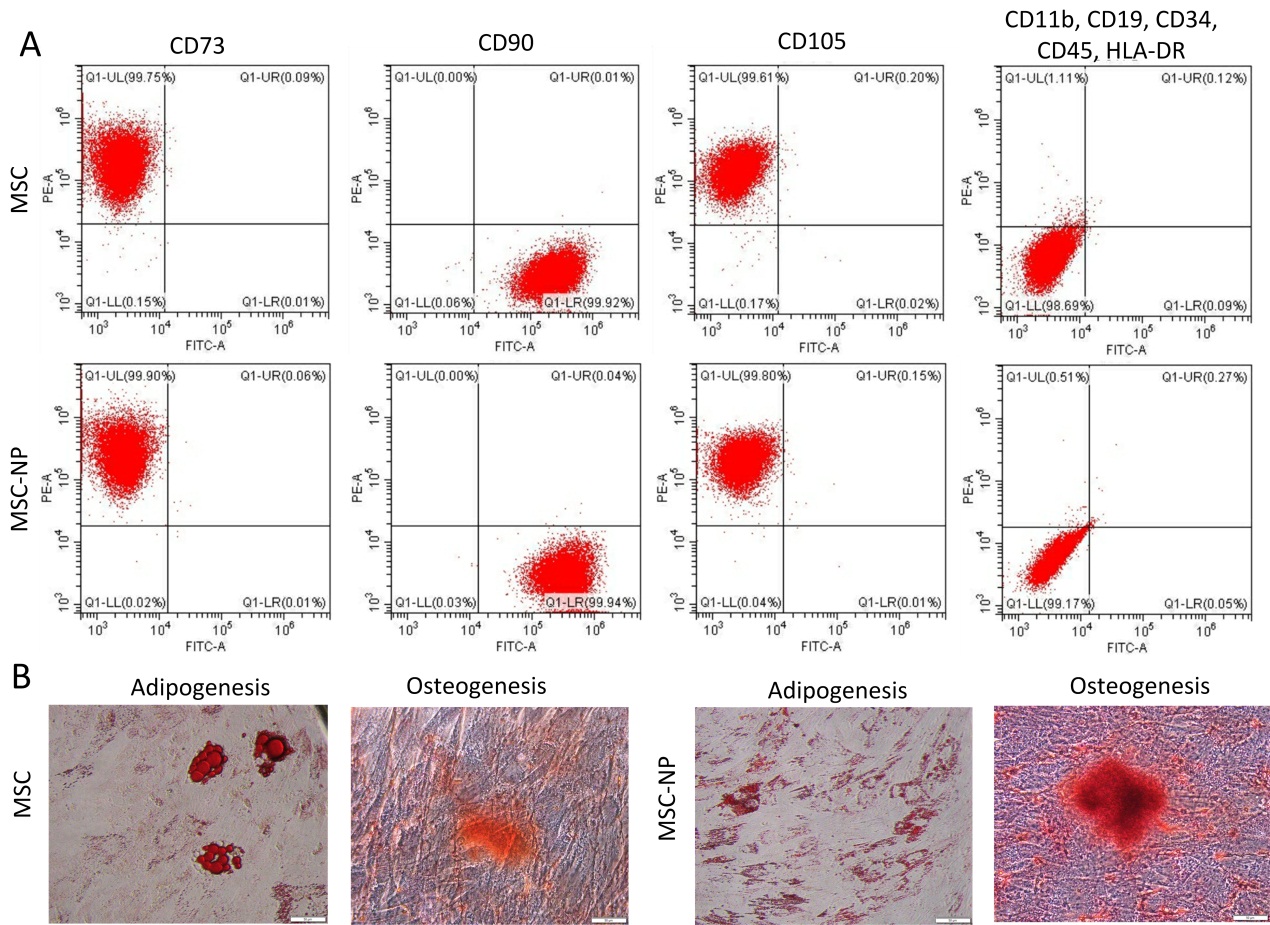
**

**Figure S1. Fe3O4 NPs did not affect the stem cell characteristics of PL-MSCs.** (A) Surface marker expression of NP-labeled and unlabeled MSCs. (B) Differentiation potency of NP-labeled and unlabeled MSCs.
